# Supplementary material for: Granzyme family acts as a predict biomarker in cutaneous melanoma and indicates more benefit from anti-PD-1 immunotherapy
Source: PubMed Central journal article supplement (PMC7976569; doi:10.7150/ijms.54747), 2021-02-06
Supplement: ijmsv18p1657s1.pdf [file ijmsv18p1657s1.pdf]

**Figure S1. Detection of GZMK expression in A375 and G361 CM cell lines by PCR and qRT-PCR.**

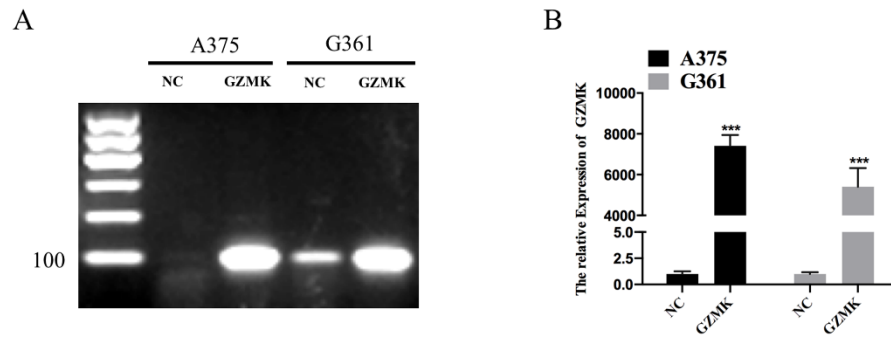

**Figure S1**

**Figure S2. Integrated prognostic value of GZMs in GSE53118 cohort.**

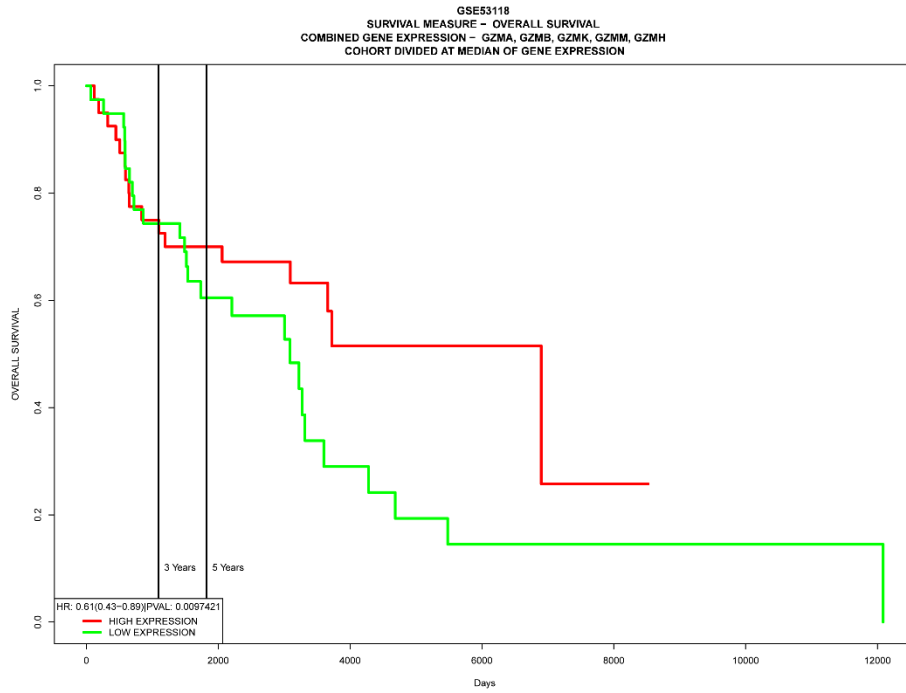

**Figure S2**

**Figure S3. Integrated prognostic value of GZMs in GSE19234 cohort.**

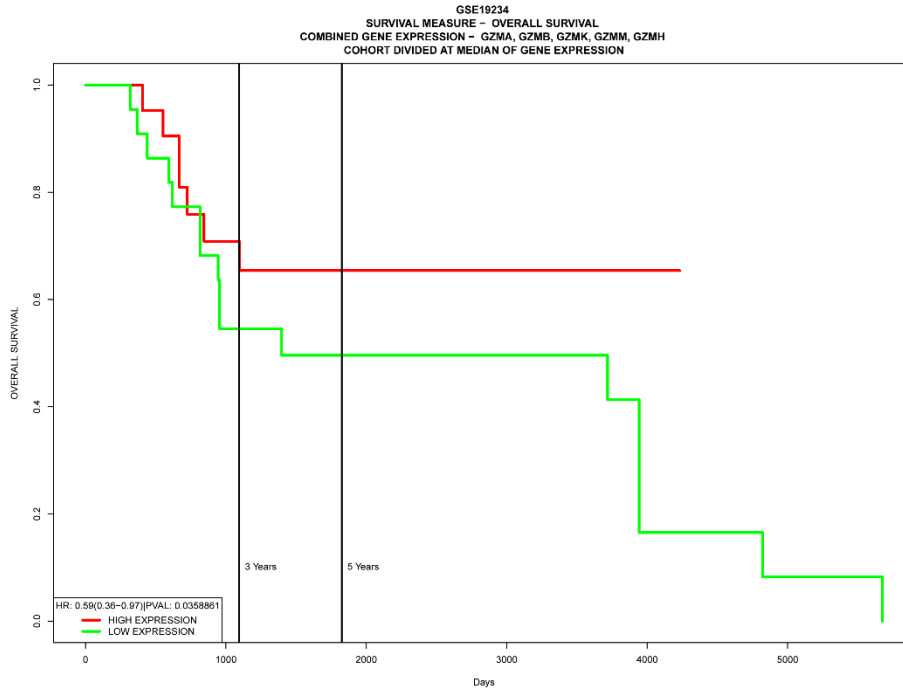

**Figure S3**

**Figure S4. Integrated prognostic value of GZMs in GSE22153 cohort.**

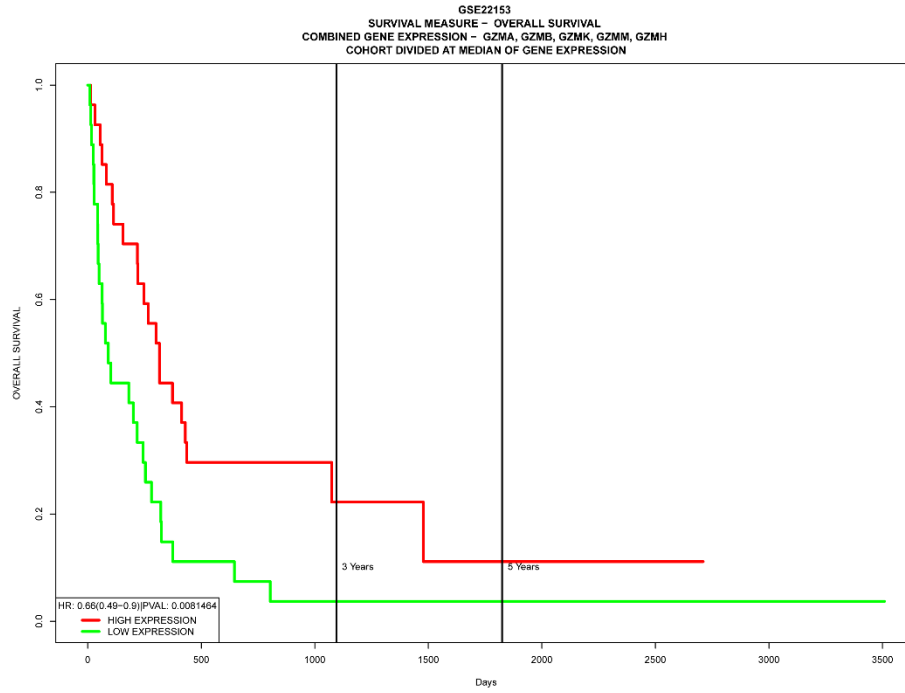

**Figure S4**

**Figure S5. GZMs expression are positively associated with the infiltration of CD8+ T cells.**

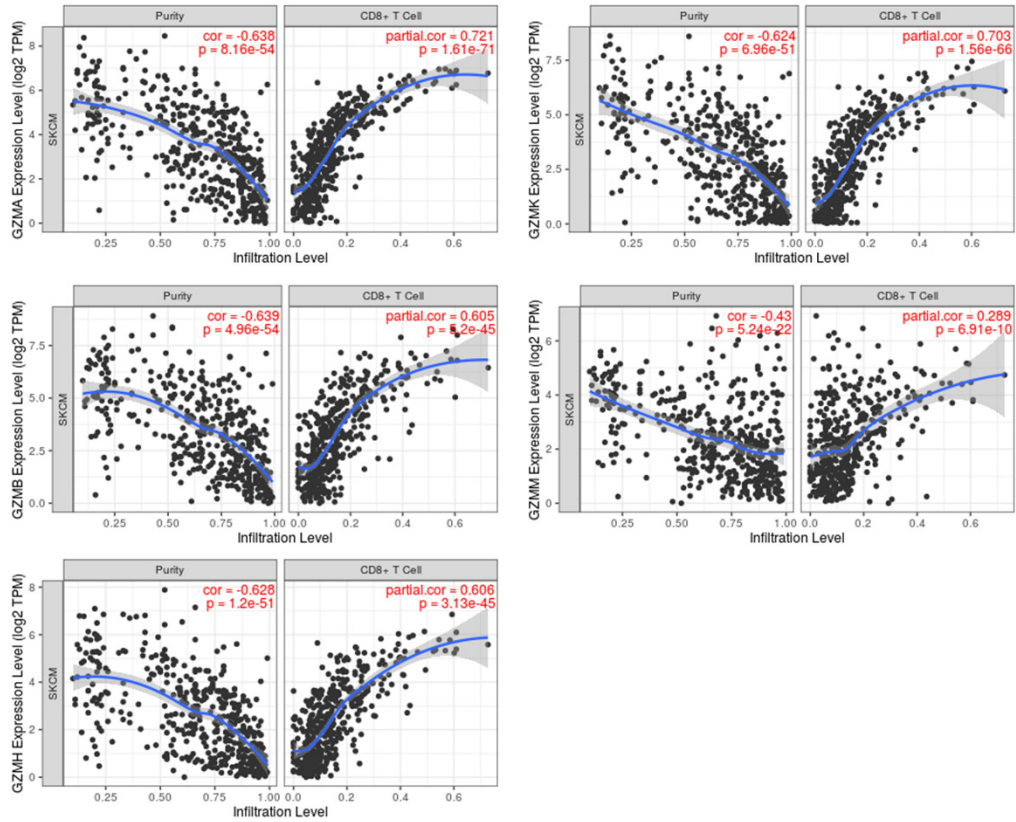

**Figure S5**
